# Supplementary material for: Genetic Mouse Models to Study Pancreatic Cancer-Induced Pain and Reduction in Well-Being
Source: MDPI journal article supplement (doi:10.3390/cells11172634), 2022-08-24
Supplement: s1 [file s1]

## SUPPLEMENTARY MATERIAL

### **Suppl. Table 1: Increased expression of several cytokines in pancreatic tissue of KPPC mice**

Post mortem we isolated the pancreatic gland including the pancreatic carcinoma and lysed it immediately. After normalizing to the total protein amount, we performed a broad semi-quantitative mouse cytokine array (RayBio® C-Series Mouse Cytokine Antibody Array C2000; #AAM-CYT-2000) according to the manufacturer's instructions. Duplicates of each cytokine were analyzed in eight KPPC mice and six control mice ("Control"). The signal intensity measured for each cytokine was analyzed in control pancreas ("Control") and in pancreatic tissue of KPPC mice. The signal intensity of each dot was normalized to the positive control (= 100).

Data are presented as mean  $\pm$  SEM. The increase in KPPC tissue was calculated according to the formula  $\text{Signal intensity}_{(\text{KPPC})} / \text{Signal intensity}_{(\text{control})}$ . Abbreviations: NA: not available because  $\text{Signal intensity}_{(\text{control})} = 0$ . \* or \*\* or \*\*\*:  $P < 0.05$  or  $< 0.01$  or  $< 0.001$  in comparison between  $\text{Signal intensity}_{(\text{KPPC})}$  and  $\text{Signal intensity}_{(\text{control})}$ ; analyzed via Mann-Whitney-U-test.

**Table S1: Increased expression of several cytokines in pancreatic tissue of KPPC mice 1.**

| Antigen           | Signal intensity<br>Control | Signal intensity<br>KPPC | Signal intensity(KPPC) /<br>Signal intensity(control) |
|-------------------|-----------------------------|--------------------------|-------------------------------------------------------|
| CXCL16            | 0 ± 0                       | 47.6 ± 12.8              | N.a.***                                               |
| TNFRSF5 (CD40)    | 0 ± 0                       | 28.9 ± 6.0               | N.a.***                                               |
| Eotaxin-2 (CCL24) | 0 ± 0                       | 27.9 ± 9.6               | N.a.*                                                 |
| KC (CXCL1)        | 0.3 ± 0.3                   | 32.6 ± 5.9               | 104***                                                |
| MDC (CCL22)       | 0.5 ± 0.5                   | 49.6 ± 4.7               | 98***                                                 |
| MIP-3 alpha       | 0.2 ± 0.1                   | 16.6 ± 3.2               | 72***                                                 |
| Fractalkine       | 0.2 ± 0.1                   | 16.3 ± 5.0               | 67*                                                   |
| IL-4              | 1.0 ± 0.6                   | 41.2 ± 7.8               | 43**                                                  |
| GM-CSF            | 0.2 ± 0.1                   | 10.1 ± 1.5               | 41**                                                  |
| GITR (TNFRSF18)   | 0.2 ± 0.1                   | 9.2 ± 2.6                | 37**                                                  |
| E-Selektin        | 0.2 ± 0.1                   | 8.1 ± 1.0                | 34***                                                 |
| IL-9              | 0.2 ± 0.1                   | 8.0 ± 2.2                | 33**                                                  |
| Pro-MMP9          | 0.2 ± 0.1                   | 6.9 ± 1.2                | 28***                                                 |
| VEGFR3            | 0.3 ± 0.1                   | 7.3 ± 1.5                | 28**                                                  |
| ACE               | 2.5 ± 1.1                   | 69.1 ± 8.9               | 27**                                                  |
| Shh-N             | 0.4 ± 0.3                   | 9.4 ± 3.0                | 25*                                                   |
| VCAM-1 (CD106)    | 5.3 ± 2.8                   | 128.0 ± 17.9             | 24***                                                 |
| MIP-1 gamma       | 19.7 ± 4.0                  | 414.6 ± 70.3             | 21***                                                 |
| IL-12 p40/p70     | 0.3 ± 0.1                   | 5.7 ± 0.8                | 20**                                                  |
| RANTES (CCL5)     | 0.3 ± 0.1                   | 4.7 ± 1.3                | 16**                                                  |
| IAM-A (CD321)     | 4.3 ± 0.3                   | 51.7 ± 13.7              | 12*                                                   |
| IGFBP-6           | 1.7 ± 1.1                   | 15.5 ± 3.6               | 8.9*                                                  |
| CD26              | 0.9 ± 0.6                   | 6.8 ± 1.7                | 7.6*                                                  |
| Fc gamma RIIB     | 12.3 ± 7.0                  | 82.9 ± 14.1              | 6.7***                                                |
| Galactin-1        | 16.4 ± 1.8                  | 109.1 ± 5.6              | 6.6*                                                  |
| MMP-2             | 11.0 ± 3.6                  | 65.6 ± 4.3               | 6.0***                                                |
| TNF RI            | 2.5 ± 2.5                   | 14.8 ± 3.1               | 5.9**                                                 |
| VEGF-A            | 1.1 ± 0.9                   | 6.3 ± 1.4                | 5.6*                                                  |
| MMP-3             | 2.1 ± 1.1                   | 11.0 ± 1.3               | 5.1***                                                |
| TNF RII           | 10.2 ± 4.7                  | 37.4 ± 3.5               | 3.6***                                                |
| LIX               | 18.5 ± 7.5                  | 62.9 ± 12.1              | 3.4**                                                 |
| bFGF              | 36.6 ± 11.0                 | 107.9 ± 8.6              | 2.9***                                                |
| OPN (SPP1)        | 52.8 ± 6.8                  | 146.6 ± 13.4             | 2.8***                                                |
| ICAM-1 (CD54)     | 43.0 ± 6.2                  | 102.6 ± 6.4              | 2.4***                                                |
| IGFBP-3           | 30.0 ± 14.2                 | 68.5 ± 10.7              | 2.3*                                                  |
| PF-4 (CXCL4)      | 28.0 ± 8.6                  | 56.4 ± 4.6               | 2.0*                                                  |
| MIP-2             | 38.3 ± 11.6                 | 68.3 ± 7.9               | 1.8*                                                  |
| IGFBP-2           | 29.1 ± 4.7                  | 50.9 ± 4.5               | 1.7**                                                 |
| IL-7              | 5.9 ± 0.6                   | 10.0 ± 0.7               | 1.7**                                                 |
| TCK-1 (CXCL7)     | 66.2 ± 13.4                 | 107.2 ± 9.9              | 1.6*                                                  |
| IGF-1             | 97.5 ± 16.0                 | 58.4 ± 9.2               | 0.6*                                                  |

Table S1 continued

| Antigen              | Signal intensity<br>Control | Signal intensity<br>KPPC | Signal intensity(KPPC) /<br>Signal intensity(control) |
|----------------------|-----------------------------|--------------------------|-------------------------------------------------------|
| Axl                  | 0.2 ± 0.1                   | 9.1 ± 3.3                | 45 n.s.                                               |
| BLC (CXCL13)         | 0.1 ± 0.1                   | 5.8 ± 2.7                | 48 n.s.                                               |
| CD30 Ligand          | 0 ± 0                       | 1.3 ± 1.3                | N.a. n.s.                                             |
| CD30 (TNFSF8)        | 0 ± 0                       | 0 ± 0                    | N.a. n.s.                                             |
| CRG-2                | 0 ± 0                       | 2.1 ± 2.2                | N.a. n.s.                                             |
| CTACK (CCL27)        | 38.0 ± 11.8                 | 30.8 ± 5.4               | 0.8 n.s.                                              |
| Eotaxin-1 (CCL11)    | 3.1 ± 1.8                   | 5.0 ± 4.2                | 1.7 n.s.                                              |
| Fas Ligand (TNFSF6)  | 0 ± 0                       | 1.9 ± 0.9                | N.a. n.s.                                             |
| GCSF                 | 0 ± 0                       | 3.7 ± 3.4                | N.a. n.s.                                             |
| IFN-gamma            | 0 ± 0                       | 0.4 ± 0.4                | N.a. n.s.                                             |
| IGFBP-5              | 17.1 ± 9.1                  | 9.8 ± 2.1                | 0.5 n.s.                                              |
| IL-1 alpha (IL-1 F1) | 20.1 ± 10.6                 | 23.9 ± 3.8               | 1.1 n.s.                                              |
| IL-1 beta (IL-1 F2)  | 0 ± 0                       | 0 ± 0                    | N.a. n.s.                                             |
| IL-2                 | 0 ± 0                       | 0 ± 0                    | N.a. n.s.                                             |
| IL-3                 | 0 ± 0                       | 0 ± 0                    | N.a. n.s.                                             |
| IL-3 R beta          | 0.5 ± 0.4                   | 0 ± 0                    | 0 n.s.                                                |
| IL-5                 | 0 ± 0                       | 2.3 ± 1.5                | N.a. n.s.                                             |
| IL-6                 | 0 ± 0                       | 3.8 ± 2.5                | N.a. n.s.                                             |
| IL-10                | 0 ± 0                       | 0 ± 0                    | N.a. n.s.                                             |
| IL-12 p70            | 21.6 ± 11.0                 | 36.6 ± 4.9               | 1.7 n.s.                                              |
| IL-13                | 4.4 ± 2.5                   | 10.2 ± 2.1               | 2.2 n.s.                                              |
| IL-17A               | 0 ± 0                       | 2.4 ± 1.7                | N.a. n.s.                                             |
| Leptin R             | 0 ± 0                       | 3.7 ± 1.3                | N.a. n.s.                                             |
| Leptin               | 17.2 ± 8.6                  | 12.6 ± 2.6               | 0.7 n.s.                                              |
| L-Selectin (CD62L)   | 0 ± 0                       | 3.4 ± 1.7                | N.a. n.s.                                             |
| Ltn (XCL1)           | 7.8 ± 4.0                   | 18.7 ± 4.4               | 2.4 n.s.                                              |
| MCP-1 (CCL2)         | 40.3 ± 13.2                 | 55.7 ± 6.7               | 1.4 n.s.                                              |
| MCP-5                | 8.8 ± 0.6                   | 17.4 ± 2.9               | 2.0 n.s.                                              |
| M-CSF                | 47.3 ± 17.1                 | 48.9 ± 5.0               | 1.0 n.s.                                              |
| MIG (CXCL9)          | 6.8 ± 4.1                   | 8.4 ± 1.7                | 1.2 n.s.                                              |
| MIP-1 alpha (CCL3)   | 0 ± 0                       | 0.2 ± 0.1                | N.a. n.s.                                             |
| MIP-3 beta (CCL19)   | 2.8 ± 2.5                   | 8.1 ± 1.7                | 2.9 n.s.                                              |
| P-Selectin           | 24.3 ± 7.2                  | 34.3 ± 3.3               | 1.4 n.s.                                              |
| SCF                  | 7.9 ± 2.7                   | 6.9 ± 2.4                | 0.8 n.s.                                              |
| SDF-1 alpha          | 21.1 ± 4.0                  | 32.5 ± 6.3               | 1.5 n.s.                                              |
| TARC (CCL17)         | 17.6 ± 17.6                 | 21.3 ± 4.9               | 1.2 n.s.                                              |
| I-309 (TCA-3/CCL1)   | 59.1 ± 20.5                 | 64.8 ± 7.0               | 1.1 n.s.                                              |
| TECK (CCL25)         | 0 ± 0                       | 2.6 ± 1.0                | N.a. n.s.                                             |
| TIMP-1               | 30.0 ± 18.2                 | 29.3 ± 3.3               | 1.0 n.s.                                              |
| TNF alpha            | 2.6 ± 2.6                   | 2.6 ± 2.1                | 1.0 n.s.                                              |
| TPO                  | 4.0 ± 2.0                   | 10.2 ± 2.0               | 2.5 n.s.                                              |
| Dtk                  | 11.0 ± 2.7                  | 16.1 ± 1.9               | 1.5 n.s.                                              |
| Flt-3 Ligand         | 28.4 ± 11.6                 | 11.0 ± 1.6               | 0.4 n.s.                                              |
| HGFR                 | 1.3 ± 1.2                   | 2.1 ± 0.7                | 1.6 n.s.                                              |
| IGF-2                | 4.9 ± 1.5                   | 6.6 ± 0.6                | 1.3 n.s.                                              |
| IL-15                | 1.1 ± 0.7                   | 4.4 ± 1.4                | 3.7 n.s.                                              |
| IL-17 RB             | 0.8 ± 0.5                   | 1.5 ± 1.5                | 1.7 n.s.                                              |
| I-TAC (CXCL11)       | 20.3 ± 4.6                  | 22.9 ± 2.1               | 1.1 n.s.                                              |
| Lungkine (CXCL15)    | 30.0 ± 6.4                  | 38.8 ± 3.0               | 1.3 n.s.                                              |
| OPG (TNFRSF11B)      | 1.2 ± 0.6                   | 11.1 ± 4.8               | 9.2 n.s.                                              |
| Resistin             | 17.8 ± 2.7                  | 16.9 ± 1.5               | 0.9 n.s.                                              |

Table S1 continued

| Antigen              | Signal intensity<br>Control | Signal intensity<br>KPPC | Signal intensity <sub>(KPPC)</sub> /<br>Signal intensity <sub>(control)</sub> |
|----------------------|-----------------------------|--------------------------|-------------------------------------------------------------------------------|
| TIMP-2               | 11.5 ± 2.2                  | 15.3 ± 1.6               | 1.3 <sup>n.s.</sup>                                                           |
| TRANCE (TNFSF11)     | 15.1 ± 3.4                  | 18.9 ± 1.7               | 1.3 <sup>n.s.</sup>                                                           |
| TROY (TNFRSF19)      | 27.2 ± 9.0                  | 26.3 ± 1.9               | 1.0 <sup>n.s.</sup>                                                           |
| TSLP                 | 0 ± 0                       | 0 ± 0                    | N.a. <sup>n.s.</sup>                                                          |
| VEGFR1               | 41.2 ± 15.6                 | 40.0 ± 4.2               | 1.0 <sup>n.s.</sup>                                                           |
| VEGFR2               | 0 ± 0                       | 3.0 ± 0.9                | N.a. <sup>n.s.</sup>                                                          |
| VEGF-D               | 0 ± 0                       | 1.3 ± 0.9                | N.a. <sup>n.s.</sup>                                                          |
| 4-1BB (TNFRSF9)      | 0 ± 0                       | 1.8 ± 1.2                | N.a. <sup>n.s.</sup>                                                          |
| 6Ckine (CCL21)       | 0.1 ± 0.1                   | 6.6 ± 6.4                | 48.9 <sup>n.s.</sup>                                                          |
| ALK-1                | 3.4 ± 0.5                   | 19.3 ± 6.0               | 5.7 <sup>n.s.</sup>                                                           |
| AR                   | 5.3 ± 1.9                   | 21.1 ± 2.4               | 4.0 <sup>n.s.</sup>                                                           |
| CT-1                 | 2.7 ± 2.6                   | 3.7 ± 2.8                | 1.4 <sup>n.s.</sup>                                                           |
| CD27 (TNFRSF7)       | 0 ± 0                       | 8.4 ± 6.3                | N.a. <sup>n.s.</sup>                                                          |
| CD27 ligand          | 0 ± 0                       | 0 ± 0                    | N.a. <sup>n.s.</sup>                                                          |
| CD36 (SR-B3)         | 6.5 ± 2.5                   | 36.2 ± 9.6               | 5.5 <sup>n.s.</sup>                                                           |
| CD40 ligand          | 9.4 ± 2.0                   | 41.8 ± 10.1              | 4.4 <sup>n.s.</sup>                                                           |
| Chordin              | 0 ± 0                       | 0 ± 0                    | N.a. <sup>n.s.</sup>                                                          |
| CTLA-4 (CD152)       | 1.6 ± 0.8                   | 24.6 ± 8.9               | 15.1 <sup>n.s.</sup>                                                          |
| Decorin              | 44.8 ± 26.5                 | 92.9 ± 5.9               | 2.1 <sup>n.s.</sup>                                                           |
| DKK-1                | 2.6 ± 1.3                   | 21.4 ± 5.1               | 8.2 <sup>n.s.</sup>                                                           |
| E-Cadherin           | 19.5 ± 14.7                 | 100.8 ± 13.5             | 5.1 <sup>n.s.</sup>                                                           |
| EGF                  | 0.9 ± 0.9                   | 13.7 ± 11.9              | 15.1 <sup>n.s.</sup>                                                          |
| Endoglin (CD105)     | 1.1 ± 1.1                   | 32.9 ± 8.8               | 29.3 <sup>n.s.</sup>                                                          |
| Epigen               | 0 ± 0                       | 1.1 ± 1.1                | N.a. <sup>n.s.</sup>                                                          |
| Epiregulin           | 3.5 ± 0.4                   | 23.1 ± 9.7               | 6.5 <sup>n.s.</sup>                                                           |
| Gas1                 | 3.5 ± 0.8                   | 16.1 ± 4.3               | 4.6 <sup>n.s.</sup>                                                           |
| Gas6                 | 7.0 ± 0.8                   | 75.7 ± 13.1              | 10.8 <sup>n.s.</sup>                                                          |
| GITR ligand          | 6.3 ± 0.3                   | 22.1 ± 8.1               | 3.5 <sup>n.s.</sup>                                                           |
| Granzyme B           | 5.0 ± 0.1                   | 56.6 ± 13.8              | 11.3 <sup>n.s.</sup>                                                          |
| HAI-1                | 5.0 ± 1.8                   | 23.4 ± 5.3               | 4.6 <sup>n.s.</sup>                                                           |
| HGF                  | 0 ± 0                       | 0 ± 0                    | N.a. <sup>n.s.</sup>                                                          |
| IL-1R4 (ST2)         | 34.0 ± 2.5                  | 35.6 ± 9.8               | 1.0 <sup>n.s.</sup>                                                           |
| IL-11                | 29.1 ± 7.2                  | 33.6 ± 12.7              | 1.1 <sup>n.s.</sup>                                                           |
| IL-17B               | 25.0 ± 11.6                 | 39.4 ± 11.9              | 1.6 <sup>n.s.</sup>                                                           |
| IL-17E (IL-25)       | 8.0 ± 2.5                   | 11.6 ± 6.7               | 1.4 <sup>n.s.</sup>                                                           |
| IL-17F               | 16.4 ± 8.2                  | 18.4 ± 10.7              | 1.1 <sup>n.s.</sup>                                                           |
| IL-1 RA (IL-1 F3)    | 4.1 ± 1.6                   | 138.8 ± 17.6             | 33.4 <sup>n.s.</sup>                                                          |
| IL-2 R alpha         | 4.3 ± 0.3                   | 28.5 ± 16.5              | 6.5 <sup>n.s.</sup>                                                           |
| IL-20                | 0 ± 0                       | 0.6 ± 0.6                | N.a. <sup>n.s.</sup>                                                          |
| IL-21                | 6.1 ± 0.2                   | 20.2 ± 5.0               | 3.2 <sup>n.s.</sup>                                                           |
| IL-28A               | 6.2 ± 0.1                   | 34.6 ± 6.6               | 5.6 <sup>n.s.</sup>                                                           |
| IL-6R                | 4.2 ± 0.2                   | 29.9 ± 7.3               | 7.1 <sup>n.s.</sup>                                                           |
| Mad-CAM-1            | 0 ± 0                       | 0 ± 0                    | N.a. <sup>n.s.</sup>                                                          |
| MFG-E8               | 0 ± 0                       | 0 ± 0                    | N.a. <sup>n.s.</sup>                                                          |
| Neprilysin           | 2.8 ± 1.2                   | 2.2 ± 2.2                | 0.8 <sup>n.s.</sup>                                                           |
| Pentraxin-3 (TSG-14) | 8.1 ± 4.1                   | 5.9 ± 3.5                | 0.7 <sup>n.s.</sup>                                                           |
| Prolactin            | 12.0 ± 4.5                  | 5.7 ± 3.6                | 0.5 <sup>n.s.</sup>                                                           |
| RAGE                 | 0 ± 0                       | 0 ± 0                    | N.a. <sup>n.s.</sup>                                                          |
| TACI (TNFRSF13B)     | 2.0 ± 1.5                   | 4.5 ± 4.2                | 2.2 <sup>n.s.</sup>                                                           |
| TREM-1               | 25.8 ± 8.1                  | 33.0 ± 5.9               | 1.3 <sup>n.s.</sup>                                                           |
| TWEAK (TNFSF12)      | 4.1 ± 1.2                   | 5.8 ± 3.6                | 1.4 <sup>n.s.</sup>                                                           |
| TWEAK R              | 18.3 ± 6.2                  | 29.4 ± 9.3               | 1.6 <sup>n.s.</sup>                                                           |
